## THE RELATIONSHIP BETWEEN INTRACELLULAR pH AND SWIMMING PERFORMANCE OF BROWN TROUT EXPOSED TO NEUTRAL AND SUBLETHAL pH

P. J. BUTLER and N. DAY

*School of Biological Sciences, The University of Birmingham, Edgbaston,  
Birmingham B15 2TT*

*Accepted 6 November 1992*

### Summary

Adult brown trout were acclimated for 2–4 weeks to artificial soft water ( $[Ca^{2+}]$   $25 \mu\text{mol l}^{-1}$ ) at neutral pH and at summer ( $15^\circ\text{C}$ ) temperature. During this period they swam against a current of approximately  $0.25 \text{ ms}^{-1}$ . They then had their dorsal aorta cannulated and were exposed to neutral or sublethal pH (4.5) for 4 days in still water.

After 4 days of exposure to sublethal pH, critical swimming speed ( $U_{\text{crit}}$ ) was 35% lower than that for fish at neutral pH. There were significant increases in arterial  $P_{\text{CO}_2}$  and in blood lactate concentrations at  $U_{\text{crit}}$  compared with the values in resting fish at neutral pH and these led to significant reductions in plasma pH. There were no such changes in fish at sublethal pH. There were no significant changes in intracellular pH (pHi) of red blood cells at  $U_{\text{crit}}$ , probably as a result of increases in the levels of plasma catecholamines. There were significant reductions in pHi of red and white muscle fibres at  $U_{\text{crit}}$ . It is argued that these values were not as low in the white fibres as those seen in previous studies after fish have been chased to exhaustion and, therefore, that the fish in the present study were not completely exhausted, although they would no longer swim at a steady speed. As pHi of the red muscle was the same at  $U_{\text{crit}}$  for fish at neutral and at sublethal pH, it is suggested that  $U_{\text{crit}}$  (fatigue) coincides with a particular pHi of the red muscles and possible mechanisms are discussed.

### Introduction

There is increasing evidence that acute exposure to low environmental pH has a detrimental effect on the swimming performance of salmonid fish. Although Waiwood and Beamish (1978) found that exposure to water at pH6 had no effect on the swimming performance of fingerling rainbow trout, a more thorough study by Graham and Wood (1981) found that critical swimming speed ( $U_{\text{crit}}$ ; Brett, 1964) was significantly depressed at pH values below 4.6 in soft water. The fish had not been acclimated to the test pH and no physiological measurements were made, but the authors suggested that impairment of gas exchange and/or of oxygen transport were the major factors affecting the fishes' swimming performance. More recently, Ye and Randall (1991) found that 24h of exposure to high (>pH9) or low pH (<pH6) reduced swimming performance in adult

Key words: intracellular pH, swimming, fatigue, brown trout, low pH, *Salmo trutta*.

rainbow trout and Ye *et al.* (1991) suggested, but did not demonstrate, that exposure to low pH reduced the oxygen content of arterial blood and, therefore, that oxygen transport capacity was impaired. This contention was not supported by a study on brown trout in which there was no reduction in arterial oxygen content ( $Ca_{O_2}$ ) in fish exposed to sublethal pH for 4 days: in fact at 15°C, there was a significant increase in  $Ca_{O_2}$  as the result of a rise in haemoglobin concentration (Butler *et al.* 1992). There were also no signs of any impairment of gas exchange. There were, however, signs of haemoconcentration in these fish and the authors did not rule out the possibility of an increase in blood viscosity which could have had subtle, adverse effects on the local circulation and thus impaired oxygen transport to the locomotor muscles. In fact, McDonald *et al.* (1980) reported an increase in blood lactate concentration in rainbow trout after exposure to low pH, which could be indicative of impaired oxygen transport. Thus, upon exposure to low pH, any impairment of oxygen transport resulting from haemoconcentration, which is itself the result of disturbances in ionoregulation (McDonald *et al.* 1980; Milligan and Wood, 1982), is likely to lead to a reduction in swimming performance (Butler *et al.* 1992).

There is much debate as to the possible causes of fatigue during exercise in vertebrates and one possible cause is a reduction in intracellular pH (pHi) (Metzger and Fitts, 1987). Jones and Randall (1978) discuss the possible causes of fatigue in fish, where problems associated with ionoregulation may be important (see also Gonzalez and McDonald, 1992). They dismiss the role of pHi in swimming failure in fish 'in the absence of a profligate bout of burst swimming'. This is probably true if they were referring to *complete* swimming failure. However, fish swum to  $U_{crit}$  are still able to undergo burst activity: they are merely unable or unwilling to swim at a steady speed. Their inability to maintain a constant speed for a set time could well be the result of a critical pHi having been reached in the red muscle. The fact that trout have a lower  $U_{crit}$  in acid water than in neutral water could indicate that protons have an inhibitory effect on exercise (Nelson, 1989) and thus provides an ideal model for testing the above hypothesis.

The purpose of the present study was, therefore, to determine pHi of locomotor (and cardiac) muscles in resting fish and in fish at  $U_{crit}$  acclimated to water at either neutral or at sublethal pH. Also, as circulating levels of cortisol and catecholamines increase during swimming at or near  $U_{crit}$  in trout (Zelnick and Goldspink, 1981; Butler *et al.* 1986) and as catecholamines, at least, may enhance swimming performance (Butler *et al.* 1989; Johnson *et al.* 1991), the concentrations of these two hormones were also determined.

### Materials and methods

The animals and their holding conditions were as described by Butler *et al.* (1992), except that in the present experiments only summer (June to mid-September) fish kept at 15°C were used. Briefly, brown trout, *Salmo trutta* (L.) (total length 30–46cm, mass 320–520g), were obtained from the Leadmill trout farm, Hathersage, Derbyshire, and kept for 2–4 weeks in large (1400l) circular glass fibre tanks through which dechlorinated Birmingham tapwater flowed at a rate of 120l h<sup>-1</sup>. The water was aerated vigorously and circulated around the tank using a pump and spray bar which produced jets of water that

were nearly horizontal when they hit the water surface. The fish were provided with plastic tubes (10cm diameter, 55cm length) suspended in mid water, in which they could position themselves. Because the water was circulating around the tank (at approximately  $0.25 \text{ ms}^{-1}$ ) and through the tubes, the fish had to swim to maintain position.

Following the initial acclimation period, the fish were transferred into a similar tank containing artificial lakewater (Dalziel *et al.* 1985), also circulating at  $0.25 \text{ ms}^{-1}$ . The concentration of  $\text{Ca}^{2+}$  ( $25 \mu\text{mol l}^{-1}$ ) is similar to that found in some areas of the UK, e.g. Galloway (Harriman *et al.* 1987), mid Wales and north Wales (Turnpenny *et al.* 1987). Titanium cooling coils and small aquarium heaters maintained the temperature of the water in the two large holding tanks at  $15^\circ\text{C}$  (June to mid-September,  $12\text{--}16^\circ\text{C}$  at the trout farm). The pH of this water was maintained at  $7\pm 0.1$  (range). The fish were kept under these conditions for a further 2–4 weeks (see Booth *et al.* 1988) after the initial period in Birmingham tapwater. Throughout the acclimation period the fish were exposed to the natural photoperiod and were fed daily on floating pellets [Mainstream trout diet, B.P. Nutrition (U.K.) Ltd]. All uneaten pellets were removed from the tank an hour after feeding. No food was given the day before transfer of the fish to an experimental tank, or during the experimental period. Sublethal pH for the fish was determined as described by Butler *et al.* (1992) and was pH4.5.

After acclimation, fish were anaesthetised in buffered MS222 and the dorsal aorta was cannulated. The animals were placed into a Blazka-type water channel and left to recover for 2 days. They were then left for a further 4 days at neutral pH or at sublethal pH. Experiments were performed alternately at neutral and sublethal pH to avoid seasonal bias. On the fifth day (third experimental day) the fish were infused with  $0.22 \text{ MBq kg}^{-1}$  ( $6 \mu\text{Ci kg}^{-1}$ ) [ $^{14}\text{C}$ ]DMO and  $0.74 \text{ MBq kg}^{-1}$  ( $20 \mu\text{Ci kg}^{-1}$ ) [ $^3\text{H}$ ]mannitol. At the end of the exposure period (at least 18h after injection of [ $^{14}\text{C}$ ]DMO and [ $^3\text{H}$ ]mannitol), data were collected from resting fish or from fish that had been swum up to their  $U_{\text{crit}}$  (see Butler *et al.* 1992, for details). 2–3ml of arterial blood was removed from the dorsal aorta for the determination of arterial plasma pH using a Radiometer BMS3 blood micro system and a PHM 73 pH/blood gas monitor, plasma carbon dioxide content ( $\text{CaCO}_2$ ) using a Corning 965  $\text{CO}_2$  analyser and the intracellular pH (pHi) of red blood cells (RBCs) using the freeze/thaw method (Zeidler and Kim, 1977).  $\text{PaCO}_2$  was determined from the Henderson–Hasselbalch equation, for which  $\alpha\text{CO}_2$  (solubility of  $\text{CO}_2$  in plasma) and  $\text{pK}^1$  were obtained from the formulae presented by Boutilier *et al.* (1984). pHi of RBCs, cardiac muscle, red and white skeletal muscle were determined by the DMO method (Waddell and Butler, 1959; Heisler, 1975; Milligan and Wood, 1985, 1986*a,b*), with [ $^3\text{H}$ ]mannitol being used to determine extracellular fluid volume (ECFV).

Following the removal of the arterial blood sample, the fish was carefully removed from the swim tube. It was found that, by placing a large piece of filter foam over the animal before such removal, it did not struggle. The fish was then immediately stunned and decapitated and the heart removed. The ventricle was divided into three 100–150mg portions which were lightly blotted to remove any blood and placed into pre-weighed Eppendorf tubes. Similar-sized samples of red and white muscle were similarly prepared, care being taken to remove the thin layer of fat and any white muscle fibres from the red muscle and not to use the superficial layer of dorsal white muscle as it tends to be fatty.

The muscle samples were taken from the same position on the fish each time (red, anterior; white, anterior, dorsal). These muscle samples, together with 50–100  $\mu\text{l}$  samples of plasma and red blood cells, were dried to constant weight over a period of 7–10 days. Samples were processed in a biological oxidiser (OX400, R. J. Harvey Instrument Corporation, USA) to release and separate the [ $^{14}\text{C}$ ] and [ $^3\text{H}$ ] isotopes. Comparison of oxidised with unoxidised known standards gave recovery efficiencies between 69 and 83%. [ $^{14}\text{C}$ ] and [ $^3\text{H}$ ] activities were determined with a Beckman LS 1700 scintillation counter using 'Optisorb S' and 'Optisorb 4' (LKB Scintillation Products, UK), respectively, as scintillation solutions.

The concentrations of plasma catecholamines, noradrenaline (Nadr) and adrenaline (Adr) were determined using reverse-phase, ion-pair HPLC with electrochemical detection (Ehrenström and Johansson, 1985, 1987; Butler *et al.* 1989). Plasma cortisol concentration was measured by radioimmunoassay (Hargreaves and Ball, 1977; Kenyon *et al.* 1985). Water in the holding tanks and water channel was monitored weekly for  $P_{\text{O}_2}$ ,  $\text{CO}_2$  content and total ammonia content (Verdouw *et al.* 1978). The first was always greater than 20 kPa, the second less than  $0.1 \text{ mmol l}^{-1}$  and the third less than  $20 \mu\text{mol l}^{-1}$  in the holding tanks and less than  $10 \mu\text{mol l}^{-1}$  in the water channel.

All values are given as the mean  $\pm$  s.e. Between-treatment comparisons were analysed by two-way analysis of variance (ANOVA). If significant ( $P < 0.05$ ), pairwise comparisons were made with the Tukey multicomparison (honestly significant different) test.

## Results

### $U_{\text{crit}}$

As reported earlier (Butler *et al.* 1992), exposure to sublethal pH had significant effects on  $U_{\text{crit}}$  in these fish. At neutral pH,  $U_{\text{crit}}$  was  $2.21 \pm 0.08 \text{ bodylengths per second, bl s}^{-1}$  ( $0.73 \pm 0.02 \text{ ms}^{-1}$ ), whereas at sublethal pH it was  $1.37 \pm 0.08 \text{ bl s}^{-1}$  ( $0.48 \pm 0.03 \text{ ms}^{-1}$ ).  $N=7$  and 8 respectively.

### $P_{\text{aCO}_2}$ and blood lactate concentration

There was a significant increase in  $P_{\text{aCO}_2}$  in response to swimming at neutral pH, but no effect of exposure to sublethal pH nor of swimming at sublethal pH (Fig. 1A). Blood lactate concentration in resting fish was not affected by exposure to sublethal pH. At  $U_{\text{crit}}$ , there was a significant, fourfold increase in blood lactate concentration above the resting value at neutral pH but no significant change at sublethal pH (Fig. 1B). These last two values were significantly different from one another.

### Plasma and intracellular pH

There was no significant difference in any of the values of pH<sub>i</sub> of RBCs obtained by the freeze/thaw and DMO methods (Fig. 2B,C). Swimming to  $U_{\text{crit}}$  at neutral pH, but not at sublethal pH, caused a significant decrease in arterial pH. It had no effect on pH<sub>i</sub> of RBCs or on that of cardiac muscle at either environmental pH although there were significant decreases in pH<sub>i</sub> of the red and of the white muscles (Figs 2, 3).

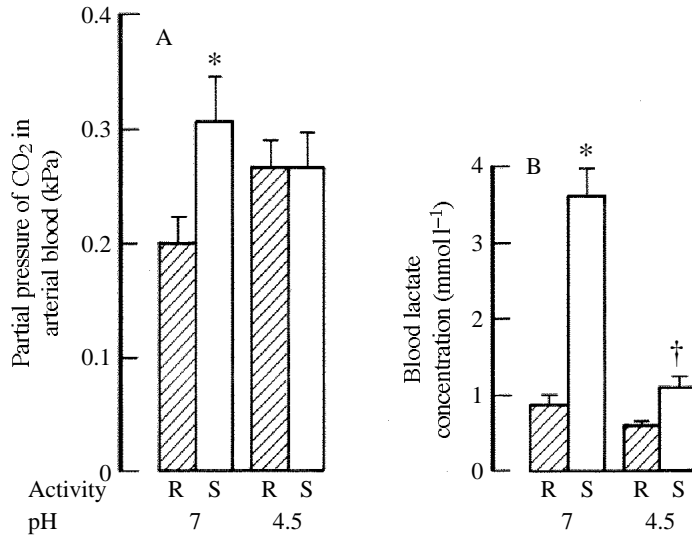

Fig. 1. Histograms showing mean values (+ s.e.) of partial pressure of CO<sub>2</sub> (A) and blood lactate concentration (B) in adult brown trout at rest (R) and while swimming at  $U_{crit}$  (S) in soft water at neutral pH (7) or after 4 days at sublethal pH (4.5). \* indicates significant effect of swimming at  $U_{crit}$  (compared with rest) at a given pH. † indicates a significant effect of pH at a given level of activity. Seven fish were used for each treatment at pH7 and eight at pH4.5. For partial pressure of CO<sub>2</sub>,  $F_{calc}$  pH=0.62,  $F_{calc}$  activity=4.30,  $F_{calc}$  pH×activity=3.47. For blood lactate,  $F_{calc}$  pH=53.55,  $F_{calc}$  activity=74.68,  $F_{calc}$  pH×activity=34.38.  $F_{0.05(1), 1, 26}=4.23$ .

Exposure to sublethal pH had no significant effects on plasma pH or on pHi of RBCs or of red, white and cardiac muscles (Figs 2B,C, 3A–C). It is interesting to note that, at  $U_{crit}$ , values of pHi in red and white muscles were similar in fish exposed to neutral pH and in those exposed to sublethal pH (Fig. 3A,B). None of the experimental variables (exercise to  $U_{crit}$ , sublethal pH) had any effect on pHi of cardiac muscle.

#### *Intra- and extracellular fluid volumes*

Values of total muscle water content, extracellular fluid volume (ECFV) and of intracellular fluid volume (ICFV) in resting fish at neutral pH are given in Table 1. Exposure to sublethal pH had no effect on ECFV or ICFV. Swimming at  $U_{crit}$  had no significant effect on ICFV or on ECFV in cardiac muscle (Fig. 4C) but in red muscle it caused a reduction in ECFV (and a rise in ICFV) at neutral pH and a rise in ECFV (together with a fall in ICFV) at sublethal pH. The values of ECFV and of ICFV at  $U_{crit}$  in red muscle from fish acclimated to neutral and to sublethal pH were significantly different from each other (Fig. 4A,D). There was a significantly higher total water content of the white muscle ( $795 \pm 3 \text{ ml kg}^{-1}$ ) in fish exposed to sublethal pH ( $N=8$ ) compared with that ( $778 \pm 5 \text{ ml kg}^{-1}$ ) in fish at neutral pH ( $N=7$ ). The effects of swimming at  $U_{crit}$  on ECFV and ICFV of white muscle were not so clear. Under no condition were there significant, complementary changes in both variables. At neutral pH, there was a significant increase in ICFV at  $U_{crit}$  but no change in ECFV.

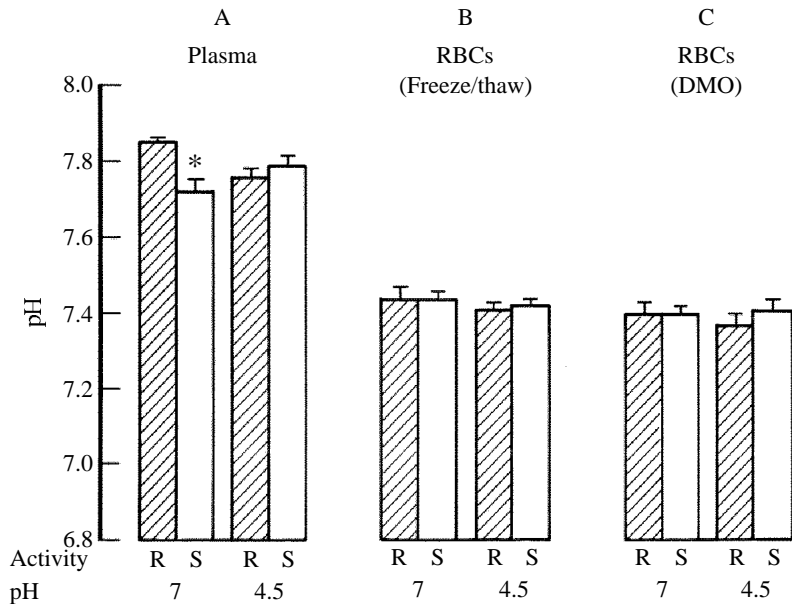

Fig. 2. Histograms showing mean values (+ S.E.) of plasma pH (A) and of intracellular pH of red blood corpuscles (RBCs) obtained by the freeze/thaw (B) and DMO (C) techniques in adult brown trout at rest (R) and while swimming at  $U_{crit}$  (S) in soft water at neutral pH (7) or after 4 days at sublethal pH (4.5). \* indicates a significant effect of swimming at  $U_{crit}$  (compared with rest) at a given pH. Seven fish were used for each treatment at pH7 and eight at pH4.5. For plasma pH,  $F_{calc} \text{ pH}=0.08$ ,  $F_{calc} \text{ activity}=4.69$ ,  $F_{calc} \text{ pH} \times \text{activity}=11.98$ . For RBCs (freeze/thaw),  $F_{calc} \text{ pH}=0.04$ ,  $F_{calc} \text{ activity}=2.40$ ,  $F_{calc} \text{ pH} \times \text{activity}=2.81$ . For RBCs (DMO),  $F_{calc} \text{ pH}=0.04$ ,  $F_{calc} \text{ activity}=0.59$ ,  $F_{calc} \text{ pH} \times \text{activity}=0.84$ .  $F_{0.05(1), 1, 26}=4.23$ .

#### *Plasma cortisol and catecholamines*

Neither exposure to sublethal pH nor swimming to  $U_{crit}$  had any effect on plasma cortisol concentration (Fig. 5A). Exposure to sublethal pH had no significant effects on the concentrations of plasma Nadr and Adr levels (Fig. 5B,C), whereas swimming at  $U_{crit}$  did cause significant increases in both Nadr and Adr at both neutral and sublethal pH. Nadr level increased to approximately three times the resting values and Adr concentration increased to 10–14 times the resting values.

### Discussion

#### *Critique of the DMO method for determining pHi*

The chosen method for determining pHi of the various muscles of brown trout depends on an estimate of ECFV of each muscle and, in a recent paper, Munger *et al.* (1991) have compared values of ECFV using different types of radiolabelled markers after different equilibration times. They used immature (180–320g) rainbow trout acclimated to 15°C. They concluded that [ $^3\text{H}$ ]polyethylene glycol (PEG) is the best of the range of markers they used for [ $^{14}\text{C}$ ]DMO determinations of pHi in fish. They point out, however, that the

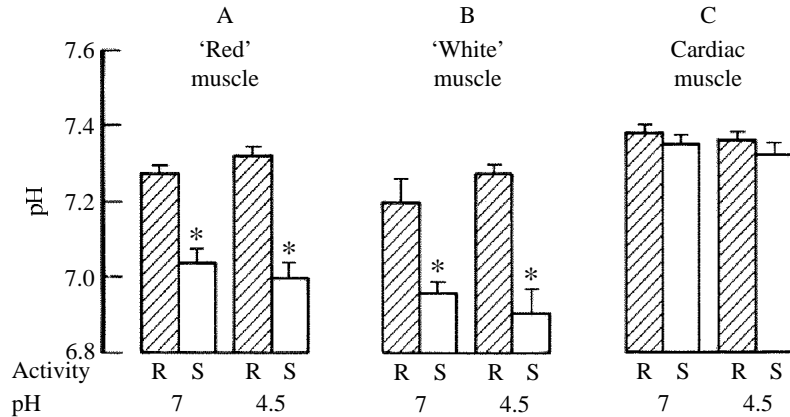

Fig. 3. Histograms showing mean values (+ s.e.) of intracellular pH of red (A), white (B) and cardiac (C) muscles in adult brown trout at rest (R) and while swimming at  $U_{crit}$  (S) in soft water at neutral pH (7) or after 4 days at sublethal pH (4.5). \* indicates a significant effect of swimming at  $U_{crit}$  (compared with rest) at a given pH. Seven fish were used for each treatment at pH7 and eight at pH4.5. For 'red' muscle,  $F_{calc}$  pH=0.52,  $F_{calc}$  activity=98.49,  $F_{calc}$  pH $\times$ activity=4.62. For 'white' muscle,  $F_{calc}$  pH=0.18,  $F_{calc}$  activity=51.64,  $F_{calc}$  pH $\times$ activity=2.10. For cardiac muscle,  $F_{calc}$  pH=1.72,  $F_{calc}$  activity=2.15,  $F_{calc}$  pH $\times$ activity=0.15.  $F_{0.05(1), 1, 26}$ =4.23.

Table 1. Total muscle water content, extracellular fluid volume (ECFV) and intracellular fluid volume (ICFV) of cardiac, red and white muscles from seven resting brown trout at 15°C and in water at neutral pH

|                    | Cardiac muscle | Red muscle  | White muscle |
|--------------------|----------------|-------------|--------------|
| Total muscle water | 811 $\pm$ 14   | 796 $\pm$ 4 | 778 $\pm$ 5  |
| ECFV               | 237 $\pm$ 14   | 135 $\pm$ 6 | 86 $\pm$ 7   |
| ICFV               | 574 $\pm$ 15   | 661 $\pm$ 7 | 692 $\pm$ 8  |

Values are mean  $\pm$  s.e. (mlkg<sup>-1</sup>).

60% increase in white muscle ECFV between [<sup>3</sup>H]PEG and [<sup>3</sup>H]mannitol reduced pHi by only 0.06 unit. As the estimate of ECFV in white muscle of resting trout in water at neutral pH in the present study is similar to that obtained by Munger *et al.* (1991) using [<sup>3</sup>H]mannitol, the small error indicated above may apply to the present values of pHi for white muscle. The value of ECFV obtained for red muscle of trout at neutral pH in the present study is very similar to that obtained by Munger *et al.* (1991) using [<sup>3</sup>H]PEG (and [<sup>3</sup>H]mannitol, as it happens), so the present values of pHi in red muscle should be acceptable. Milligan and Wood (1986b) found that the ECFV values for cardiac muscle when obtained using [<sup>3</sup>H]mannitol were unacceptably high and used inulin-derived estimates for their calculations. Although the estimate of ECFV of cardiac muscle from trout at neutral pH in the present study is some 40% greater than that obtained by Munger *et al.* (1991) using [<sup>3</sup>H]PEG, the value of pHi (7.38 $\pm$ 0.02) is similar to that obtained by Milligan and Wood (1986b) from resting adult rainbow trout acclimated to 15°C (approximately 7.35).

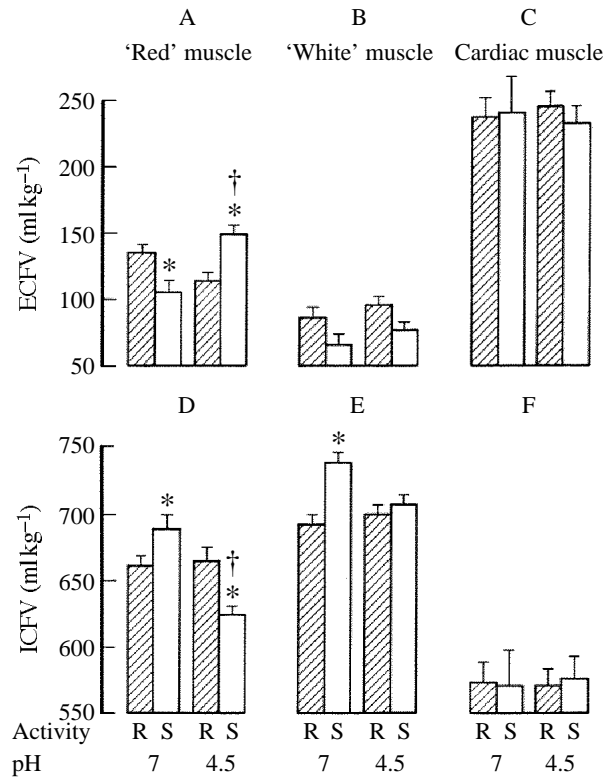

Fig. 4. Histograms showing mean values (+ S.E.) of extracellular fluid volume (ECFV) of red (A), white (B) and cardiac (C) muscles and of intracellular fluid volume (ICFV) of red (D), white (E) and cardiac (F) muscles in adult brown trout at rest (R) and while swimming at  $U_{crit}$  (S) in soft water at neutral pH (7) or after 4 days at sublethal pH (4.5). \* indicates a significant effect of swimming at  $U_{crit}$  (compared with rest) at a given pH. † indicates a significant effect of pH at a given level of activity. Seven fish were used for each treatment at pH7 and eight at pH4.5. For 'red' muscle ECFV,  $F_{calc}$  pH=2.98,  $F_{calc}$  activity=0.18,  $F_{calc}$  pH×activity=26.26. For 'white' muscle ECFV,  $F_{calc}$  pH=2.43,  $F_{calc}$  activity=9.40,  $F_{calc}$  pH×activity=0.08. For 'cardiac' muscle ECFV,  $F_{calc}$  pH=0.00,  $F_{calc}$  activity=0.11,  $F_{calc}$  pH×activity=2.44. For 'red' muscle ICFV,  $F_{calc}$  pH=7.11,  $F_{calc}$  activity=61.44,  $F_{calc}$  pH×activity=4.77. For 'white' muscle ICFV,  $F_{calc}$  pH=2.80,  $F_{calc}$  activity=15.50,  $F_{calc}$  pH×activity=8.64. For cardiac muscle ICFV,  $F_{calc}$  pH=0.00,  $F_{calc}$  activity=0.00,  $F_{calc}$  pH×activity=0.03.  $F_{0.05(1), 1, 26}=4.23$ .

Another possible source of error of the DMO method for determining  $pH_i$  in the present set of experiments is the time taken for full equilibration of DMO between the intra- and extracellular compartments. Milligan and Wood (1985) demonstrated that, provided the markers had already fully equilibrated throughout the fish, the DMO method could reliably detect changes in  $pH_i$  of white muscle 15min after the onset of the transient. Milligan and Wood (1986b) then demonstrated that after 6min of exhaustive exercise of rainbow trout,  $pH_i$  of white muscle may be overestimated by approximately 0.1 unit. It seems inevitable, therefore, that, for the relatively poorly perfused white muscle,  $pH_i$  at  $U_{crit}$  may only be accurate in those fish that swam at the final speed for 10–15min. The shorter the time below this value, the greater could be the error. The error



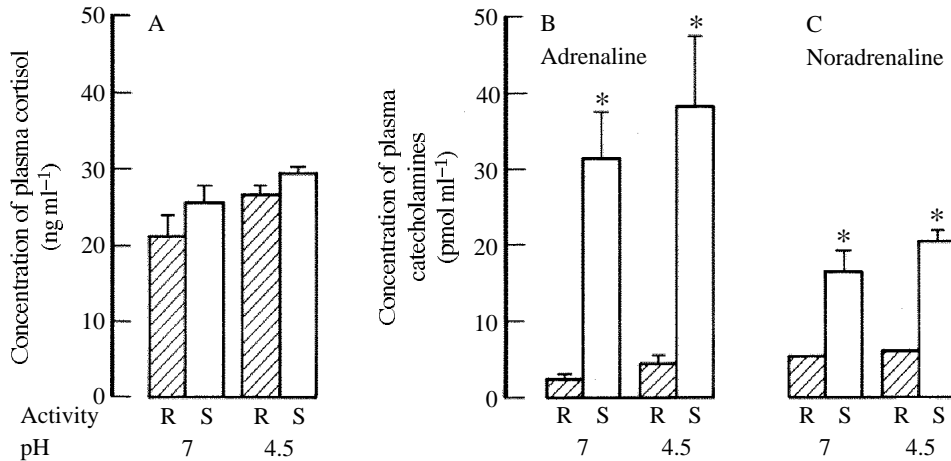

Fig. 5. Histograms showing mean values (+ s.e.) of plasma concentrations of cortisol (A), noradrenaline (B) and adrenaline (C) in adult brown trout at rest (R) and while swimming at  $U_{crit}$  (S) in soft water at neutral pH (7) or after 4 days at sublethal pH (4.5). \* indicates a significant effect of swimming at  $U_{crit}$  (compared with rest) at a given pH. Seven fish were used for each treatment at pH7 and eight at pH4.5. For plasma cortisol,  $F_{calc}$  pH=6.99,  $F_{calc}$  activity=4.86,  $F_{calc}$  pH×activity=0.29. For plasma adrenaline,  $F_{calc}$  pH=0.60,  $F_{calc}$  activity=31.75,  $F_{calc}$  pH×activity=0.22. For plasma noradrenaline,  $F_{calc}$  pH=2.29,  $F_{calc}$  activity=67.81,  $F_{calc}$  pH×activity=0.96.  $F_{0.05(1), 1, 26}=4.23$ .

is likely to be less in the better perfused red and cardiac muscles, and for RBCs the DMO method gave accurate values of pHi (or at least, the same as those obtained by the freeze/thaw method) under all conditions.

The values of pHi in white and cardiac muscle in resting fish at 15°C are virtually identical to those obtained by Milligan and Wood (1986b) using the DMO technique, from resting rainbow trout at 15°C. Tang and Boutilier (1991), using the tissue homogenate technique of Pörtner *et al.* (1990), obtained a pHi value for white muscle in resting rainbow trout which is some 0.1 unit higher than that obtained in the present study. As their animals were at 10°C, a somewhat higher value might be expected (Cameron, 1984).

#### Exposure to sublethal pH

Exposure to sublethal pH had no effect on plasma pH, nor on pHi of RBCs and of the muscle tissues and these findings are consistent with those of Playle *et al.* (1989) and Wood (1989) for fish in very soft water ( $[Ca^{2+}]$ , 0.05 mequiv l<sup>-1</sup>). In hard water ( $[Ca^{2+}]$ , 2.0 mequiv l<sup>-1</sup>), however, there was a substantial (0.2 unit) reduction in plasma pH, significant falls in pHi of cardiac muscle and RBCs, but no change in pHi of red and white muscles (Wood, 1989). Thus, in the present experiments, the maintenance of pHi of the RBCs meant that oxygen transport was not compromised as a result of the Bohr and Root effects. It has already been demonstrated that both haemoglobin concentration, [Hb], and oxygen content of arterial blood,  $CaO_2$ , increase substantially at 15°C in trout exposed to sublethal pH (Butler *et al.* 1992). Consistent with this, and contrary to the finding of

McDonald *et al.* (1980), is the lack of increase in blood lactate concentration in response to sublethal pH. As in the present experiments, exposure to low pH in soft water has been found to have no effect on plasma cortisol after 2–3 days (Goss and Wood, 1988; Brown *et al.* 1989), whereas the latter authors did find a significant increase after 7 days' exposure. Previous studies have also shown that exposure of trout to low pH (4) does not cause a significant increase in catecholamine levels, except just before death (Ye *et al.* 1991; Brown, 1992).

Unlike the situation with rainbow trout at 14°C exposed to pH 4–4.5 for 3 days (Milligan and Wood, 1982), there was no apparent movement of fluid from extracellular to intracellular space of white muscle in the present experiments, although there was a significant increase in total muscle water content of a similar magnitude to that reported by Milligan and Wood (1982). The reason(s) for this discrepancy is unknown, although the severity of acid exposure in Milligan and Wood's experiments was probably greater than that in the present experiments, where the haemodynamic responses were less extreme (see Butler *et al.* 1992).

#### *Swimming at $U_{crit}$*

Swimming at  $U_{crit}$  at neutral pH did cause a significant shift in water from the extracellular to the intracellular compartment of red and (possibly) of white muscle, which is similar to the situation found in rainbow trout chased to exhaustion (Milligan and Wood, 1986a). These authors attributed this, at least in part, to the production of the osmotically active lactate within the muscle. In fish exposed to sublethal pH, the movement of water in red muscle at  $U_{crit}$  was in the opposite direction. The reason for this is unclear, but there was a much lower blood lactate concentration in fish at  $U_{crit}$  at sublethal pH than at neutral pH.

Swimming to  $U_{crit}$  caused a significant reduction in plasma pH in fish at neutral pH, and this reduction was accompanied by an increase in blood lactate to a level similar to that recorded by Driedzic and Kiceniuk (1976) and in  $P_{aCO_2}$  (see Thomas *et al.* 1987). Plasma pH at  $U_{crit}$  was the same for animals at neutral pH as it was for those at sublethal pH. Swimming at  $U_{crit}$  had no effect on pHi of the RBCs under any condition; this was probably related to the significant increases in catecholamine levels (Primmatt *et al.* 1986). Neither did swimming to  $U_{crit}$  have a significant effect on pHi of cardiac muscle, which is similar to the situation in rainbow trout after being chased to exhaustion (Milligan and Wood, 1986b). The mechanism(s) responsible for this is unknown, although it has been suggested that it may involve the uptake of lactate (Farrell and Milligan, 1986).

In both red and white muscles, pHi values are similar at  $U_{crit}$  when the fish are exposed to neutral or to sublethal pH. Studies on rainbow trout by Milligan and Wood (1986b) at 15°C and Tang and Boutilier (1991) at 10°C indicate that pHi of white muscle after the fish had been chased to exhaustion can be as low as 6.8–6.6, which is lower than that in fish at  $U_{crit}$  and neutral pH in the present study. Also, in other studies (Milligan and Wood, 1986a; Wood *et al.* 1990), it was found that rainbow trout chased to exhaustion have substantially higher concentrations of blood lactate (5–6 mmol l<sup>-1</sup>) at the end of the period of activity than those found in the present study. Thus, in terms of *burst* exercise, it

is assumed that the fish in the present study had not reached complete exhaustion and could, if prompted, have performed further burst swimming. They were, nonetheless, unable (or unwilling) to swim at a *constant* speed any longer. It would appear, therefore, that sustained swimming is terminated when pHi of the red muscle reaches a particular value of approximately 7.0.

In salmonids, white muscle fibres are recruited during sustained swimming (Johnston and Moon, 1980) and lactate accumulates in both red and white muscles, at least during the early stages of sustained swimming in rainbow trout (Wokoma and Johnston, 1981). These phenomena can explain the reduction in pHi at  $U_{crit}$  in these two types of muscle in brown trout, at least for the fish in water at neutral pH. However, there is no increase in blood lactate level in fish at  $U_{crit}$  in water at sublethal pH, although the reductions in pHi of the red and white muscles are similar to those at  $U_{crit}$  at neutral pH. Nelson (1989) and Nelson and Mitchell (1992) have described a similar phenomenon in yellow perch, *Perca flavescens*, where fish from lakes at neutral pH have a reduced  $U_{crit}$  when exposed to acid water yet have a much lower blood lactate concentration than when swimming at  $U_{crit}$  in neutral water. Lactate concentration in the white muscle is also lower at  $U_{crit}$  in fish in acid water (Nelson, 1990), which indicates a reduced capacity for anaerobiosis under these conditions.

If this also occurred in the fish exposed to sublethal pH in the present experiments, then when sufficient power could not be provided by aerobic metabolism, at a relatively low swimming speed, ATP consumption would exceed its production, thus producing sufficient protons to cause a reduction in pHi of the red and white muscles (see Milligan and Wood, 1986b). Two factors may have exacerbated this situation: aerobic metabolism itself may have been compromised as a result of impaired oxygen transport (see Introduction) and a low environmental pH may reduce the ability of the fish to excrete at the gills the metabolically produced  $H^+$ . It should be noted that work on humans has indicated that the decrease in strong ion difference (SID) in exercising muscle, which accounts for most of the increase in  $[H^+]$ , is as much the result of a fall in  $[K^+]$  as of a rise in [lactate] (Kowalchuk *et al.* 1988).

The causal relationship between acidosis and muscle fatigue is not clear. Work on mammals indicates that an increase in  $[H^+]$  may have a direct effect on excitation–contraction coupling (Metzger and Fitts, 1987) or may reduce the rate and extent of the cross-bridge transition from the low to the high force state (Thompson *et al.* 1992). There is also a close relationship between  $[H^+]$  and  $Ca^{2+}$ -ATPase activity, indicating that acidity may impair  $Ca^{2+}$  transport in the sarcoplasmic reticulum (O'Brien *et al.* 1991). Other evidence suggests that  $H^+$  may impair muscle function by causing a decrease in phosphocreatine (PCr) concentration (Sahlin, 1986; Katz *et al.* 1986), either directly, by displacing the creatine kinase reaction ( $H^+ + ADP + PCr \rightarrow ATP + Cr$ ) towards breakdown of PCr (but see Meyer *et al.* 1991), or indirectly, by way of increased [ADP]. It has also been suggested for mammals, that the loss of  $K^+$  from exercising muscle may itself impair contractility (Sjøgaard, 1986), as well as contributing to the increase in  $[H^+]$  (see above). Further studies on fish, particularly using isolated muscle fibres (Johnson *et al.* 1991), may help elucidate more clearly the relationship between  $[H^+]$  and fatigue in vertebrate muscle.

This work was supported by the Natural Environmental Research Council. The authors wish to thank Professor I. W. Henderson for performing the cortisol assays.

### References

- BOUTILIER, R. G., HEMING, T. A. AND IWAMA, G. K. (1984). Physicochemical parameters for use in fish respiratory physiology. In *Fish Physiology*, vol. 10 (ed. W. S. Hoar and D. J. Randall), pp. 403–430. New York: Academic Press.
- BOOTH, C. E., McDONALD, D. G., SIMONS, B. P. AND WOOD, C. M. (1988). Effects of aluminum and low pH on net ion fluxes and ion balance in the brook trout (*Salvelinus fontinalis*). *Can. J. Fish Aquat. Sci.* **45**, 1563–1574.
- BRETT, J. R. (1964). The respiratory metabolism and swimming performance of young sockeye salmon. *J. Fish Res. Bd Can.* **21**, 1183–1226.
- BROWN, J. A. (1992). Endocrine responses to environmental pollutants. In *Fish Ecophysiology* (ed. J. C. Rankin, F. B. Jensen, J. Chapman and J. Hall). (in press).
- BROWN, J. A., EDWARDS, D. AND WHITEHEAD, C. (1989). Cortisol and thyroid hormone responses to acid stress in the brown trout, *Salmo trutta* L. *J. Fish Biol.* **35**, 73–84.
- BUTLER, P. J., AXELSSON, M., EHRENSTRÖM, F., METCALFE, J. D. AND NILSSON, S. (1989). Circulating catecholamines and swimming performance in the Atlantic cod, *Gadus morhua*. *J. exp. Biol.* **141**, 377–387.
- BUTLER, P. J., DAY, N. AND NAMBA, K. (1992). Interactive effects of seasonal temperature and low pH on resting oxygen uptake and swimming performance of adult brown trout *Salmo trutta*. *J. exp. Biol.* **165**, 195–212.
- BUTLER, P. J., METCALFE, T. D. AND GINLEY, S. A. (1986). Plasma catecholamines in the lesser spotted dogfish and rainbow trout at rest and during different levels of exercise. *J. exp. Biol.* **113**, 409–421.
- CAMERON, J. N. (1984). Acid–base status of fish at different temperatures. *Am. J. Physiol.* **246**, R452–R459.
- DALZIEL, T. R. K., MORRIS, R. AND BROWN, D. J. A. (1985). The effects of low pH, low calcium concentrations and elevated aluminium concentrations on sodium fluxes in brown trout, *Salmo trutta*. CEGB report no. TPRD/L/2861/N85.
- DRIEDZIC, W. R. AND KICENIUK, J. W. (1976). Blood lactate levels in free-swimming rainbow trout (*Salmo gairdneri*) before and after strenuous exercise resulting in fatigue. *J. Fish. Res. Bd Can.* **33**, 173–176.
- EHRENSTRÖM, F. AND JOHANSSON, P. (1985). A method for very rapid determination of catechols using ion-pairing reverse phase HPLC with electrochemical detection: Effects of L-DOPA treatment on the catechol content in various rat brain structures. *Life Sci.* **36**, 867–879.
- EHRENSTRÖM, F. AND JOHANSSON, P. (1987). Circadian rhythms and contents of catechols in different brain structures, peripheral organs and plasma of the Atlantic cod, *Gadus morhua*. *Comp. Biochem. Physiol.* **87C**, 193–202.
- FARRELL, A. P. AND MILLIGAN, C. L. (1986). Myocardial intracellular pH in a perfused rainbow trout heart during extracellular acidosis in the presence and absence of adrenaline. *J. exp. Biol.* **125**, 347–359.
- GONZALEZ, R. J. AND McDONALD, D. G. (1992). The relationship between oxygen consumption and ion loss in a freshwater fish. *J. exp. Biol.* **163**, 317–332.
- GOSS, G. G. AND WOOD, C. M. (1988). The effects of acid and acid/aluminum exposure on circulating plasma cortisol levels and other blood parameters in the rainbow trout, *Salmo gairdneri*. *J. Fish Biol.* **32**, 63–76.
- GRAHAM, M. S. AND WOOD, C. M. (1981). Toxicity of environmental acid to the rainbow trout: interactions of water hardness, acid type and exercise. *Can. J. Zool.* **59**, 1518–1526.
- HARGREAVES, G. AND BALL, J. N. (1977). Cortisol in *Poecilia latipinna*: Its identification and the validation of methods for its determination in plasma. *Steroids* **30**, 303–313.
- HARRIMAN, R., MORRISON, B. R. S., CAINES, L. A., COLLEN, P. AND WATT, A. W. (1987). Long-term changes in fish populations of acid streams and lochs in Galloway south west Scotland. *Water Air Soil Poll.* **32**, 89–112.
- HEISLER, N. (1975). Intracellular pH of isolated rat diaphragm muscle with metabolic and respiratory changes of extracellular pH. *Respir. Physiol.* **23**, 243–255.

- JOHNSON, T. P., MOON, T. W. AND JOHNSTON, I. A. (1991). Actions of epinephrine on the contractility of fast and slow skeletal muscle fibres in teleosts. *Fish Physiol. Biochem.* **9**, 83–89.
- JOHNSTON, I. A. AND MOON, T. W. (1980). Exercise training in skeletal muscle of brook trout (*Salvelinus fontinalis*). *J. exp. Biol.* **87**, 177–194.
- JONES, D. R. AND RANDALL, D. J. (1978). The respiratory and circulatory systems during exercise. In *Fish Physiology*, vol. 7 (ed. W. S. Hoar and D. J. Randall), pp. 425–501. New York: Academic Press.
- KATZ, A., SAHLIN, K. AND HENRIKSSON, J. (1986). Muscle ATP turnover rate during isometric contraction in humans. *J. appl. Physiol.* **60**, 1839–1842.
- KENYON, C. J., MCKEEVER, A., OLIVER, J. A. AND HENDERSON, I. W. (1985). Control of renal and adrenocortical function by the renin-angiotensin system in two euryhaline teleost fishes. *Gen. comp. Endocr.* **58**, 93–100.
- KOWALCHUK, J. M., HEIGENHAUSER, G. J. F., LINDINGER, M. I., SUTTON, J. R. AND JONES, N. L. (1988). Factors influencing hydrogen ion concentration in muscle after intense exercise. *J. appl. Physiol.* **65**, 2080–2089.
- MCDONALD, D. G., HÖBE, H. AND WOOD, C. M. (1980). The influence of calcium on the physiological responses of the rainbow trout, *Salmo gairdneri*, to low environmental pH. *J. exp. Biol.* **88**, 109–131.
- METZGER, J. M. AND FITTS, R. H. (1987). Role of intracellular pH in muscle fatigue. *J. appl. Physiol.* **66**, 1392–1397.
- MEYER, R. A., ADAMS, G. R., FISHER, M. J., DILLON, P. F., KRISANDA, J. M., BROWN, T. R. AND KUSHMERICK, M. J. (1991). Effect of decreased pH on force and phosphocreatine in mammalian skeletal muscle. *Can. J. Physiol. Pharmacol.* **69**, 305–310.
- MILLIGAN, C. L. AND WOOD, C. M. (1982). Disturbances in haematology, fluid volume distribution and circulatory function associated with low environmental pH in the rainbow trout, *Salmo gairdneri*. *J. exp. Biol.* **99**, 397–415.
- MILLIGAN, C. L. AND WOOD, C. M. (1985). Intracellular pH transients in rainbow trout tissues measured by dimethadione distribution. *Am. J. Physiol.* **248**, R668–R673.
- MILLIGAN, C. L. AND WOOD, C. M. (1986a). Intracellular and extracellular acid–base status and H<sup>+</sup> exchange with the environment after exhaustive exercise in the rainbow trout. *J. exp. Biol.* **123**, 93–121.
- MILLIGAN, C. L. AND WOOD, C. M. (1986b). Tissue intracellular acid–base status and the fate of lactate after exhaustive exercise in the rainbow trout. *J. exp. Biol.* **123**, 123–144.
- MUNGER, R. S., REID, S. D. AND WOOD, C. M. (1991). Extracellular fluid volume measurements in tissues of the rainbow trout (*Oncorhynchus mykiss*) *in vivo* and their effects on intracellular pH and ion calculations. *Fish Physiol. Biochem.* **9**, 313–323.
- NELSON, J. A. (1989). Critical swimming speeds of yellow perch *Perca flavescens*: Comparison of populations from a naturally acidic lake and a circumneutral lake in acid and neutral water. *J. exp. Biol.* **145**, 239–254.
- NELSON, J. A. (1990). Muscle metabolite response to exercise and recovery in yellow perch (*Perca flavescens*): comparison of populations from naturally acidic and neutral waters. *Physiol. Zool.* **63**, 886–908.
- NELSON, J. A. AND MITCHELL, G. S. (1992). Blood chemistry response to acid exposure in yellow perch (*Perca flavescens*): Comparison of populations from naturally acidic and neutral environments. *Physiol. Zool.* **65**, 493–514.
- O'BRIEN, P. J., SHEN, H., WEILER, J., IANUZZO, C. D., WITTNICH, C., MOE, G. W. AND ARMSTRONG, P. W. (1991). Cardiac and muscle fatigue due to relative functional overload induced by excessive stimulation, hypersensitive excitation–contraction coupling, or diminished performance capacity correlates with sarcoplasmic reticulum failure. *Can. J. Physiol. Pharmacol.* **69**, 262–268.
- PLAYLE, R. C., GOSS, C. G. AND WOOD, C. M. (1989). Physiological disturbances in rainbow trout (*Salmo gairdneri*) during acid and aluminum exposure in soft water of two calcium concentrations. *Can. J. Zool.* **67**, 314–324.
- PÖRTNER, H. O., BOUTILIER, R. G., TANG, Y. AND TOEWS, D. P. (1990). Determination of intracellular pH and P<sub>CO<sub>2</sub></sub> after metabolic inhibition by fluoride and nitrilotriacetic acid. *Respir. Physiol.* **81**, 255–274.
- PRIMMETT, D. R. N., RANDALL, D. J., MAZEAUD, M. AND BOUTILIER, R. G. (1986). The role of catecholamines in erythrocyte pH regulation and oxygen transport in rainbow trout (*Salmo gairdneri*) during exercise. *J. exp. Biol.* **122**, 139–148.
- SAHLIN, K. (1986). Metabolic changes limiting muscle performance. In *Biochemistry of Exercise*, vol. 16 (ed. B. Saltin), pp. 323–343. Illinois: Human Kinetics Publ.

- SJØGAARD, G. (1986). Water and electrolyte fluxes during exercise and their relation to muscle fatigue. *Acta physiol. scand.* **128**, 129–136.
- TANG, Y. AND BOUTILIER, R. G. (1991). White muscle intracellular acid–base and lactate status following exhaustive exercise: a comparison between freshwater- and seawater-adapted rainbow trout. *J. exp. Biol.* **156**, 153–171.
- THOMAS, S., POUPIN, J., LYKKEBOE, G. AND JOHANSEN, K. (1987). Effects of graded exercise on blood gas tensions and acid–base characteristics of rainbow trout. *Respir. Physiol.* **68**, 85–97.
- THOMPSON, L. V., BALOG, E. M. AND FITTS, R. H. (1992). Muscle fatigue in frog semitendinosus: role of intracellular pH. *Am. J. Physiol.* **262**, C1507–C1512.
- TURNPENNY, A. W. H., SADLER, K., ASTON, R. J., MILNER, A. G. P. AND LYNAM, S. (1987). The fish populations of some streams in Wales and northern England in relation to acidity and associated factors. *J. Fish Biol.* **31**, 415–434.
- VERDOUW, H., VAN ECHTELD, C. J. A. AND DEKKERS, E. M. J. (1978). Ammonia determination based on indophenol formation with sodium salicylate. *Water Res.* **12**, 399–402.
- WADDELL, W. J. AND BUTLER, T. C. (1959). Calculation of intracellular pH from the distribution of 5,5-dimethyl-2,4-oxazolinedione (DMO). Application to skeletal muscle of the dog. *J. clin. Invest.* **38**, 720–729.
- WAIWOOD, K. G. AND BEAMISH, F. W. H. (1978). Effects of copper, pH and hardness on the critical swimming performance of rainbow trout (*Salmo gairdneri* Richardson). *Water Res.* **12**, 611–619.
- WOKOMA, A. AND JOHNSTON, I. A. (1981). Lactate production at high sustainable cruising speeds in rainbow trout (*Salmo gairdneri* Richardson). *J. exp. Biol.* **90**, 361–364.
- WOOD, C. M. (1989). The physiological problems of fish in acid waters. In *Acid Toxicity and Aquatic Animals* (ed. R. Morris, E. W. Taylor, D. J. A. Brown and J. A. Brown), pp. 125–151. Cambridge: Cambridge University Press.
- WOOD, C. M., WALSH, P. J., THOMAS, S. AND PERRY, S. F. (1990). Control of red blood cell metabolism in rainbow trout after exhaustive exercise. *J. exp. Biol.* **154**, 492–507.
- YE, X. AND RANDALL, D. J. (1991). The effect of water pH on swimming performance in rainbow trout (*Salmo gairdneri*, Richardson). *Fish Physiol. Biochem.* **9**, 15–21.
- YE, X., RANDALL, D. J. AND HE, X. (1991). The effect of acid water on oxygen consumption, circulating catecholamines and blood ionic and acid–base status in rainbow trout (*Salmo gairdneri*, Richardson). *Fish Physiol. Biochem.* **9**, 23–30.
- ZEIDLER, R. AND KIM, H. D. (1977). Preferential hemolysis of postnatal calf red cells induced by internal alkalinization. *J. gen. Physiol.* **70**, 385–401.
- ZELNICK, P. R. AND GOLDSPIK, G. (1981). The effect of exercise on plasma cortisol and blood sugar levels in the rainbow trout, *Salmo gairdneri*, Richardson. *J. Fish Biol.* **19**, 37–43.
